# Supplementary material
Source: MDPI journal article supplement (https://www.mdpi.com/2218-2004/3/3/273)
Supplement: s1 [file s1]

Lines of W IX excited in a vacuum spark at 30 kA current

I,a.u. WL,A      WN,cm-1

   63 170.006   588215.3
   35 170.040   588095.6
   25 170.065   588011.2
   41 170.079   587961.0
   16 170.114   587840.4
   16 170.135   587769.3
   16 170.154   587702.9
   84 170.203   587535.1
  120 170.269   587306.0
   25 170.312   587159.1
  339 170.336   587076.3
   95 170.353   587017.1
   23 170.389   586891.3
   20 170.444   586703.6
   20 170.468   586619.3
  120 170.648   586001.9
   35 170.681   585887.9
   31 170.718   585762.0
   20 170.800   585480.8
   38 171.203   584100.9
   95 171.216   584056.2
   18 171.390   583465.3
   20 171.461   583222.3
   28 171.648   582587.6
   21 171.959   581534.3
  309 172.038   581265.3
   21 172.202   580713.0
   21 172.233   580609.5
   21 172.723   578962.0
   25 172.813   578660.2
   33 172.835   578584.8
   30 173.004   578020.0
   35 173.198   577374.2
   36 173.288   577074.3
   16 173.304   577021.1
   25 173.366   576814.7
   33 173.432   576596.5
   20 173.755   575523.7
   18 173.797   575383.3
   25 173.993   574735.8
   25 174.423   573318.9
   36 174.512   573025.5
   25 174.885   571805.9
   23 174.899   571759.9
   46 174.924   571676.8
   26 174.973   571518.4
   79 174.997   571437.4
   41 175.414   570080.6
   56 175.490   569834.3
   49 175.636   569359.7
   43 175.644   569334.8
   20 175.680   569216.1
   41 175.974   568265.8
   59 176.002   568174.1
   21 176.041   568050.8
   36 176.099   567863.7
   38 176.308   567190.2
   16 176.414   566848.4
   38 176.469   566670.2
   81 176.493   566595.7
   18 176.534   566462.1
   23 176.565   566364.6
   63 176.660   566060.4
   82 176.752   565763.8
   33 176.827   565525.4
   39 176.867   565397.6
   18 176.900   565292.4
   20 176.938   565170.7
   43 176.972   565061.1
   35 177.003   564960.6
   18 177.026   564889.1
   18 177.042   564837.4
   44 177.087   564693.3
   41 177.107   564631.1
   30 177.128   564563.5
   23 177.155   564476.5
   69 177.197   564342.1
   30 177.244   564194.3
   26 177.302   564009.4
   28 177.340   563888.6
   28 177.347   563867.6
   43 177.384   563749.7
   23 177.441   563566.6
  102 177.468   563483.1
  178 177.504   563367.9
   41 177.540   563253.7
   66 177.591   563092.9
   20 177.620   563001.3
   31 177.651   562902.4
   20 177.728   562658.2
   26 177.910   562082.9
   26 177.926   562032.1
   21 177.962   561917.7
   54 178.005   561782.3
   39 178.018   561740.6
   26 178.050   561638.8
   97 178.115   561435.0
   95 178.140   561355.3
   67 178.220   561104.9
   20 178.251   561007.9
   28 178.289   560886.5
   33 178.319   560792.1
   26 178.357   560673.6
   18 178.434   560432.9
   76 178.473   560308.2
  104 178.490   560256.4
   64 178.508   560199.6
   33 178.543   560089.2
   21 178.562   560028.3
   23 178.640   559785.7
   26 178.689   559631.9
   16 178.737   559481.6
   20 178.749   559444.6
   26 178.796   559296.3
   86 178.956   558797.5
   23 178.986   558703.9
   59 179.023   558588.7
   23 179.175   558114.2
   49 179.220   557974.1
   20 179.329   557633.1
   26 179.365   557521.1
   16 179.529   557014.6
  110 179.631   556696.2
   16 179.767   556276.9
   23 179.812   556136.1
   30 179.867   555965.4
   21 179.917   555810.9
   23 179.967   555657.4
   31 179.995   555571.3
   21 180.010   555524.1
   28 180.062   555363.3
   56 180.080   555310.0
   69 180.164   555049.6
   26 180.250   554785.6
   30 180.288   554668.7
   25 180.302   554625.6
   43 180.342   554503.6
   21 180.385   554370.1
   28 180.410   554292.7
   30 180.451   554166.4
   35 180.509   553990.3
   23 180.535   553909.8
   94 180.570   553802.8
   43 180.589   553743.6
   20 180.631   553614.8
   38 180.652   553550.8
   16 180.670   553495.9
   18 180.720   553342.2
   20 180.732   553305.1
   44 180.764   553206.9
   16 180.811   553063.7
   26 180.879   552854.9
   43 180.895   552806.6
  109 180.922   552725.6
   71 180.955   552624.8
  128 180.986   552529.6
   26 181.010   552457.2
   48 181.127   552098.2
   61 181.247   551733.3
   44 181.346   551430.6
   51 181.428   551184.1
   16 181.490   550994.6
   20 181.525   550886.8
   23 181.559   550785.8
   26 181.573   550741.8
   30 181.617   550607.8
   44 181.648   550514.4
   28 181.703   550349.3
   25 181.723   550286.9
  115 181.818   550000.3
  100 181.835   549949.1
   69 181.958   549578.9
   38 181.987   549490.1
   25 182.085   549193.8
   74 182.184   548896.8
   35 182.206   548829.6
   49 182.232   548751.4
   48 182.258   548673.7
   72 182.437   548135.0
  143 182.505   547928.7
   76 182.614   547604.1
   30 182.770   547134.9
   77 182.824   546973.6
   18 182.857   546875.8
   25 182.888   546782.4
   38 182.906   546727.4
   54 182.932   546652.4
   16 182.960   546566.7
  166 182.990   546478.9
  156 183.081   546205.8
  107 183.093   546169.9
   18 183.202   545846.2
  110 183.271   545640.7
   53 183.305   545537.9
   49 183.345   545418.9
   38 183.399   545258.1
   26 183.456   545090.8
   35 183.478   545024.2
   20 183.537   544849.3
   54 183.573   544743.0
   18 183.598   544669.8
   26 183.703   544355.8
   36 183.732   544269.8
   51 183.771   544154.0
   18 183.815   544026.4
   33 183.846   543934.4
   18 183.911   543741.0
   49 183.967   543576.3
  110 184.033   543380.8
   63 184.070   543271.6
   64 184.156   543018.2
  248 184.200   542887.0
  117 184.271   542680.2
   35 184.319   542538.8
   31 184.403   542289.4
   33 184.423   542232.3
   58 184.438   542188.2
   86 184.538   541893.8
   95 184.545   541872.9
   16 184.691   541444.3
   16 184.711   541385.7
   20 184.785   541168.9
   56 184.818   541072.3
   21 184.852   540972.8
   38 184.938   540721.8
   49 185.022   540477.4
   20 185.092   540272.4
   26 185.146   540113.4
   38 185.230   539868.5
   30 185.274   539740.0
   16 185.352   539514.0
   43 185.413   539336.8
   38 185.478   539146.9
   18 185.527   539006.0
   33 185.560   538908.1
   18 185.609   538768.1
   18 185.648   538652.4
   59 185.727   538424.7
   16 185.788   538247.3
   25 185.830   538125.4
   16 186.001   537632.9
   28 186.068   537439.4
   35 186.109   537318.7
   67 186.218   537004.4
   28 186.239   536943.9
   54 186.297   536778.4
  252 186.428   536399.6
   51 186.456   536318.4
   74 186.479   536253.7
   79 186.506   536175.2
   71 186.539   536080.1
   23 186.621   535844.3
   36 186.654   535751.5
  166 186.680   535676.3
   28 186.704   535606.6
   21 186.741   535500.4
   30 186.799   535335.1
   23 186.915   535004.0
   20 187.108   534450.4
   25 187.150   534331.3
   21 187.187   534226.3
   25 187.310   533873.5
   18 187.481   533388.3
   30 187.518   533281.3
   31 187.544   533207.1
   21 187.663   532870.1
   18 187.686   532804.5
   38 187.861   532308.2
   51 187.890   532225.4
   16 187.931   532110.5
   20 187.965   532014.8
   92 188.104   531621.1
   77 188.114   531591.4
  104 188.197   531357.6
   31 188.258   531184.8
   31 188.267   531159.7
   28 188.290   531094.3
   16 188.407   530765.0
   28 188.442   530666.7
   25 188.458   530622.5
   33 188.545   530378.5
   30 188.682   529992.8
  105 188.706   529925.1
   35 188.738   529835.0
   16 188.768   529751.4
   18 188.787   529696.6
   21 188.955   529225.4
   38 189.009   529076.2
   23 189.045   528974.9
   28 189.084   528866.1
   21 189.118   528771.3
   18 189.156   528662.8
   20 189.186   528580.9
   82 189.264   528363.3
   25 189.300   528261.4
   23 189.333   528170.3
   28 189.374   528057.0
   18 189.401   527980.9
   28 189.431   527897.6
   49 189.470   527788.9
   16 189.704   527138.4
   28 189.752   527003.1
   23 189.817   526824.1
   26 189.871   526672.8
   20 190.010   526288.4
   30 190.033   526224.1
  161 190.062   526143.6
   39 190.152   525894.8
   16 190.168   525849.8
   20 190.215   525720.6
   21 190.237   525660.9
   16 190.273   525559.3
   66 190.391   525234.9
   18 190.433   525119.6
   25 190.461   525040.8
   21 190.492   524956.4
   21 190.504   524922.6
   18 190.532   524846.8
   36 190.583   524705.3
   56 190.596   524670.6
   16 190.667   524473.5
   16 190.687   524419.3
   16 190.702   524377.3
   26 190.766   524201.9
   43 190.809   524084.6
   18 190.916   523790.8
   33 190.946   523707.7
   18 190.982   523609.3
   20 191.050   523423.2
  107 191.103   523278.3
   23 191.136   523186.8
   35 191.247   522883.5
   28 191.260   522847.4
   39 191.297   522748.4
   36 191.396   522477.0
   30 191.407   522446.7
   33 191.449   522331.8
   82 191.464   522291.7
   46 191.484   522237.4
   35 191.531   522108.4
   49 191.720   521593.4
   44 191.782   521424.8
   23 191.850   521241.6
   28 191.870   521185.1
   46 191.904   521094.4
 -304 191.933   521016.0
  243 191.984   520876.5
   48 192.019   520781.5
   28 192.035   520739.2
   54 192.090   520589.6
   84 192.117   520516.2
   26 192.261   520126.3
   33 192.297   520028.7
   39 192.313   519984.8
   16 192.347   519893.7
   25 192.380   519803.2
   35 192.410   519723.8
   33 192.440   519642.5
   87 192.468   519567.4
   16 192.514   519443.0
   33 192.532   519393.4
  370 192.591   519234.0
   20 192.674   519011.9
  199 192.715   518901.5
  102 192.771   518749.7
  541 192.834   518581.8
  194 192.859   518514.3
   23 193.038   518032.7
   21 193.069   517950.3
  132 193.091   517889.5
   21 193.128   517792.1
   87 193.174   517667.5
  115 193.229   517519.6
   18 193.279   517388.1
   18 193.291   517355.5
   53 193.342   517218.7
   23 193.384   517106.1
  118 193.411   517032.3
   95 193.428   516987.7
   21 193.452   516923.3
  290 193.490   516822.8
  443 193.549   516664.0
   49 193.588   516561.5
  303 193.636   516432.4
   30 193.671   516340.1
  209 193.719   516210.8
  181 193.771   516073.6
  696 193.830   515915.8
   48 193.897   515738.5
   46 193.919   515679.0
   35 193.937   515631.9
 -362 193.999   515467.9
   49 194.052   515325.8
 -408 194.105   515184.6
  148 194.140   515091.1
 -245 194.173   515006.0
  229 194.201   514930.2
   58 194.268   514752.3
  500 194.355   514522.1
   16 194.477   514198.8
   94 194.553   513998.2
 1000 194.646   513752.1
   31 194.708   513589.1
   25 194.765   513439.0
   66 194.792   513368.4
   99 194.803   513339.9
   77 194.832   513262.7
   46 194.845   513227.9
   84 194.910   513057.8
   43 194.961   512923.6
   30 195.058   512667.8
   31 195.086   512593.7
   66 195.114   512520.6
   43 195.126   512489.9
  130 195.192   512315.8
   31 195.238   512194.3
  153 195.259   512141.3
 -255 195.432   511685.6
  102 195.469   511590.1
   51 195.483   511552.7
   44 195.639   511145.8
  439 195.679   511040.5
   36 195.718   510938.9
   66 195.745   510869.3
   67 195.794   510741.2
   28 195.827   510653.8
   77 195.921   510410.6
   26 196.045   510086.2
  140 196.129   509869.5
   51 196.242   509573.9
   41 196.277   509483.5
   21 196.302   509419.4
   35 196.332   509342.3
   53 196.371   509239.9
   16 196.424   509103.0
   35 196.488   508938.2
   25 196.510   508880.0
   35 196.531   508826.3
   99 196.577   508707.6
  192 196.592   508667.4
   39 196.624   508586.2
   61 196.665   508478.4
   49 196.715   508350.7
   66 196.732   508306.8
   36 196.815   508091.6
   16 196.852   507996.6
   26 196.873   507940.9
   25 196.910   507845.2
   51 196.947   507751.1
  357 196.966   507702.1
   77 197.013   507579.9
  120 197.057   507467.9
   16 197.113   507321.9
  138 197.136   507263.3
   25 197.270   506918.4
   44 197.298   506847.8
  169 197.350   506714.7
   31 197.420   506534.6
   36 197.480   506379.6
   48 197.505   506315.3
   28 197.540   506226.1
  311 197.607   506056.2
   49 197.649   505947.2
   39 197.704   505807.9
   44 197.719   505769.1
   72 197.736   505724.8
   44 197.784   505602.1
  110 197.810   505535.9
   36 197.969   505128.6
   48 197.992   505071.7
   66 198.008   505031.4
   53 198.095   504807.3
   25 198.136   504704.8
  114 198.196   504551.3
   48 198.281   504335.0
   35 198.312   504255.2
   39 198.326   504221.3
   53 198.378   504088.7
   71 198.391   504056.4
   36 198.436   503940.8
   64 198.464   503869.7
  128 198.543   503668.5
  161 198.562   503621.8
